# Supplementary material
Source: Research Square preprint supplement (doi:10.21203/rs.3.rs-10042624/v1)
Supplement: Supplementary file 1 [file db73299692f20cd29a6a6505.docx]

| **Characteristic** | | | |
| --- | --- | --- | --- |
| **Age, months:** 45.6 ±46.23 (1-200) | | | |
| **Age group, n (%)** | | **n** | **%** |
| <6 months | | 68 | 17 |
| 6 months to 1 year | | 66 | 16.6 |
| 1–5 years | | 155 | 39 |
| >5 years | | 108 | 27.2 |
| **Male, n (%)** | | 222 | 55.9 |
| **History, n (%)** | |  | |
| Epilepsy | | 65 | 16.4 |
| Febrile seizure | | 40 | 10.1 |
| Neuromusculer Deficiency | | 31 | 7.8 |
| Other underlying diseasees | | 13 | 3.3 |
| **History of influenza vaccination** | | 5 | 1.3 |
| **Antiepileptic drug usage before hospitalization** | | 89 | 22.4 |
| **Influenza type** | |  | |
| Influenza A | | 283 | 71.3 |
| Influenza B | | 102 | 25.7 |
| Influenza A and B | | 2 | 0.5 |
| Rapid antigen testing | | 10 | 2.5 |
| **CSF influenza testing** | | 15 | 3.8 |
| Influenza A | | 11 | 2.8 |
| Influenza B | | 0 | 0 |
| Negative | | 4 | 1 |
| **Characteristics** | | | | |
| **Symptoms at presentation n (%)** | | | | |
| Fever ≥38°C | | 358 | | 90.2 |
| Vomiting/ Nausea/ Poor oral intake/ Headache/ Diarrhea | | 63 | | 15.8 |
| Alteration of consciousness | | 50 | | 12.6 |
| Behavioral/cognitive or speech change / decreased visual acuity | | 13 | | 3.3 |
| Dystonia | | 2 | | 0.5 |
| Ataxia | | 2 | | 0.5 |
| **Difficulty walking** | | 5 | | 1.3 |
| Syncope | | 5 | | 1.3 |
| Seizure | | 281 | | 70.8 |
| Status epilepticus | | 26 | | 6.5 |
| Abnormal movement | | 5 | | 1.3 |
| Neck stiffness | | 17 | | 4.3 |
| Focal neurological deficits | | 3 | | 0.8 |
| **Neurological symptoms at presentation** | | | | |
| **Acute symptomatic seizure** | | | | |
| -Single-episode seizure | | 23 | | 5.8 |
| -Repetitive seizure | | 40 | | 10.1 |
| -Fever-provoked seizure in known epilepsy | | 51 | | 11 |
| **Encephalitis/encephalopathy** | | | | |
| -Mild encephalopathy | | 34 | | 8.6 |
| -Severe encephalopathy | | 9 | | 2.3 |
| **Meningoencephalitis** | | 21 | | 5 |
| **MERS (reversible splenial lesion)** | | 10 | | 2.5 |
| **ANE (acute necrotizing encephalopathy)** | | 3 | | 0.8 |
| **Demyelinating disease** | | 2 | | 0.5 |
| **Focal motor deficit** | | 5 | | 1.3 |
| **Ataxia** | | 5 | | 1.3 |
| **Simple febrile convulsion** | | 148 | | 37.3 |
| **Complicated febrile convulsion** | | 50 | | 12.6 |
| **Status Epilepticus** | | 33 | | 8.3 |
| **Focal Seizures** | | 12 | | 3 |
| **Neuroimaging / EEG (if available)** | |  | |  |
| Abnormal EEG | | 75 | | 18.9 |
| Normal EEG | | 91 | | 22.9 |
| **Abnormal MRI/CT findings (if available)** | | | | |
| MERS (reversible splenial lesion) | | 10 | | 2.5 |
| Thalamic involvement | | 9 | | 2.3 |
| Diffuse cytotoxic edema / diffusion restriction | | 31 | | 7.8 |
| Brainstem involvement | | 3 | | 0.8 |
| Basal ganglia involvement | | 3 | | 0.8 |
| Isolated cortical/subcortical involvement | | 5 | | 1.3 |
| Isolated periventricular white matter involvement | | 9 | | 2.2 |
| ANE pattern | | 4 | | 1.1 |
| ADEM/demyelinating pattern | | 2 | | 0.5 |
| **Treatments** | | | | |
| Oseltamivir | | 365 | | 91.9 |
| **Time to oseltamivir initiation days: 1.75 ±1.29 1(1-14)** | | | | |
| **Duration of oseltamivir therapy days: 5.5 ±1.98 5(0-21)** | | | | |
| Empiric antibiotic therapy | | 203 | | 51.1 |
| Corticosteroid (pulse) | | 21 | | 5.2 |
| Intravenous immunoglobulin | | 25 | | 6.2 |
| Plasmapheresis | | 6 | | 1.5 |
| New antiepileptic drug initiation | | 69 | | 17 |
| Antiepileptic therapy at discharge | | 158 | | 39.8 |
| **Time to clinical recovery days: 3.05 ± 7.18** **2(1-116)** | | | | |
| **Time to neurological recovery days: 3.22 ± 10.15** **1(1-90)** | | | | |
| **ICU admission** | | 63 | 15.9 |
| **Length of hospital stay due to influenza: 6.5±12.22 1(1-139)** | | | |
| **Length of ICU stay due to influenza: 10.59±17.11 (1-116)** | | | |
| Mechanical ventilation | | 30 | 7.6 |
| **Outcome at discharge** | | | |
| **Good Outcome** | | | |
| Complete recovery | | 358 | 90.2 |
| **Poor Outcome** | | | |
| Reversible neurological sequelae (within 6 months) | | 14 | 3.5 |
| Long-term disability | | 20 | 5 |
| Fatal outcome | | 5 | 1.3 |

**n:** number of patients; **%:** column percentage. Continuous variables are presented as mean ± standard deviation and median (minimum–maximum).

**Table 2.** Demographic characteristics, underlying conditions, influenza types, presenting symptoms, neurological manifestations, neuroimaging findings, treatment characteristics, and clinical outcomes among pediatric patients with influenza-associated neurological involvement.

| **Hematological and biochemical parameters** | | | |
| --- | --- | --- | --- |
| **Parameter** | **Mean ± SD** | **Median (min–max)** | **Unit** |
| Lymphocyte count | 2366.55 ± 1940.46 | 1790 (110–15340) | cells/mm³ |
| White blood cell count (WBC) | 10011.5 ± 8248.43 | 8780 (1308–142000) | cells/mm³ |
| Neutrophil count | 6618.59 ± 6632.32 | 5640 (240–112000) | cells/mm³ |
| Hemoglobin (Hgb) | 11.39 ± 1.55 | 11.4 (5.7–18) | g/dL |
| Platelet count (PLT) | 260502.07±105950.23 | 240500 (11000-708000) | cells/mm³ |
| C-reactive protein (CRP) | 17.94 ± 36.35 | 6 (0–330) | mg/L |
| Procalcitonin | 3.86 ± 11.44 | 0.4 (0.01–93) | ng/mL |
| Alanine aminotransferase (ALT) | 47.47 ± 147.13 | 19 (1–2223) | U/L |
| Aspartate aminotransferase (AST) | 90.06 ± 286.12 | 42.65 (10–4792) | U/L |
| Lactate dehydrogenase (LDH) | 474.57 ± 631.55 | 310 (30–5640) | U/L |
| Ferritin | 505.13 ± 1783.88 | 59.15 (6.5–10759) | ng/mL |
| Creatine kinase (CK) | 743.37 ± 2388.77 | 106 (5–15200) | U/L |
| **Cerebrospinal fluid (CSF) parameters** | | | |
| CSF leukocyte count | 27.11 ± 131.93 | 1 (0–1200) | cells/mm³ |
| CSF protein | 101.63 ± 268.91 | 41 (0.2–2310) | mg/dL |
| CSF glucose | 69.55 ± 19.98 | 66 (17.5–156) | mg/dL |
| **Abnormal CBC findings, n (%)** | | | |
| Neutropenia | 22 | 5.5 | |
| Thrombocytopenia | 39 | 9.8 | |
| Lymphopenia | 201 | 50.6 | |
| Bicytopenia | 16 | 3.7 | |
| Pancytopenia | 1 | 0.3 | |
| Hepatitis | 10 | 2.5 | |
| Myositis | 19 | 4.8 | |
| Myocarditis | 2 | 0.5 | |
| Hemophagocytic Lymphohistiocytosis | 1 | 0.25 | |

**n:** number of patients; **%:** column percentage. Continuous variables are presented as mean ± standard deviation and median (minimum–maximum).

**Table 3.** Abnormal hematological findings and systemic complications a**nd hematological, biochemical, cerebrospinal fluid parameters of the study population with IANC.**

|  | **Encephalopathy (n)** | |  |
| --- | --- | --- | --- |
|  | **No** | **Yes** | **p** |
| **Age** | 40.28±43.75  24(1-200) | 73.31±49.12  72(2-180) | **0.001**† |
| **Age ≥5 years.** | | | **0.001**& |
| Yes | 37 (%57.8) | 79 (%23.7) |
| No | 27 (%42.2) | 254 (%76.3) |
| **Lymphocyte count** | 2416.18±1887.07  1880 (110-15340) | 2111.27±2193.52  1530 (390-14200) | **0.027**† |
| **White blood cell count** | 10268.71±8720.29  8960 (1630-142000) | 8688.7±5029.6  7600 (1308-27290) | **0.029**† |
| **Alanine aminotransferase** | 34.52±81.54  18 (1-1110) | 113.47±306.71  30(6-2223) | **0.001**† |
| **Aspartate aminotransferase** | 64.46±118.89  42 (10-1558) | 219.66±640.3  49 (14-4792) | **0.034**† |
| **Ferritin** | 258.81±1248.07  48 (6.5-9797) | 1295.96±2812.19  97 (12-10759) | **0.022**† |
| **Organ Involvement** | | | **0.001** ƞ |
| Yes | 30 (%9) | 17 (%26.6) |
| No | 303 (%91) | 47 (%73.4) |
| **Vomiting** | | | **0.001**& |
| Yes | 19 (%5.7) | 12 (%18.8) |
| No | 314 (%94.3) | 52 (%81.3) |
| **Feeding Difficulties** | | | **0.001**& |
| Yes | 5 (%1.5) | 10 (%15.6) |
| No | 328 (%98.5) | 54 (%84.4) |
| **Altered Consciousness** | | | **0.001**& |
| Yes | 8 (%2.4) | 42 (%65.6) |
| No | 325 (%97.6) | 22 (%34.4) |
| **Speech Disturbances** | | | **0.003** ƞ |
| Yes | 3 (%0.9) | 4 (%6.3) |
| No | 330 (%99.1) | 60 (%93.8) |
| **CT*** | | | **0.001**& |
| Yes | 46 (%13.8) | 23 (%35.9) |
| No | 287 (%86.2) | 41 (%64.1) |
| **MRI**** | | | **0.001**& |
| Yes | 154 (%46.4) | 51 (%79.7) |
| No | 178 (%53.6) | 13 (%20.3) |
| **EEG***** | | | **0.002**& |
| Yes | 132 (%39.6) | 39 (%60.9) |
| No | 201 (%60.4) | 25 (%39.1) |
| **Necrotizing Encephalopathy** | | | **0.017** ƞ |
| Yes | 1 (%0.3) | 2 (%3.1) |
| No | 332 (%99.7) | 62 (%96.9) |
| **Mesencephalic Involvement** | | | **0.022** ƞ |
| Yes | 0 (%0) | 1 (%1.6) |
| No | 333 (%100) | 63 (%98.4) |
| **Treatement**  IVIG****  Plasmapheresis  Corticosteroids  None  IVIG****+Corticosteroids  IVIG****+Plasmapheresis  IVIG****+Plasmapheresis+Corticosteroids | 6 (%1.8)  0 (%0)  8 (%2.4)  312 (%93.7)  5 (%1.5)  1 (%0.3)  1 (%0.3) | 5 (%7.8)  1 (%1.6)  3 (%4.7)  48 (%75)  4 (%6.3)  3 (%4.7)  0 (%0) | **0.001** ƞ |
| **Time from Symptom Onset to Oseltamivir Initiation** | 1.67±1.28  1 (1-14) | 2.19±1.25  2 (1-7) | **0.001**† |
| **Duration of Oseltamivir Treatment** | 5.25±1.5  5 (0-21) | 6.98±3.2  5 (2-21) | **0.001**† |
| **Time to Clinical Recovery** | 2.72±7.27  1 (1-116) | 4.87±6.39  3 (1-40) | **0.001**† |
| **Duration of Neurological Symptoms** | 2.54±9.04  1 (0.3-139) | 6.93±14.43  2 (0.3-90) | **0.001**† |
| **Length of Hospital Stay** | 5.25±10.3  2 (0-139) | 13.11±18.03  8 (1-124) | **0.001**† |
| **Clinical Recovery** | | | **0.002**& |
| Yes | 307 (%92.2) | 51 (%79.7) |
| No | 26 (%7.8) | 13 (%20.3) |
| **Neurological Outcome** | | | **0.006** ƞ |
| Complete recovery | 307 (%92.2) | 51 (%79.7) |
| Reversible neurological deficit within 6 months | 10 (%3) | 4 (%6.3) |
| Long-term neurological sequelae | 14 (%4.2) | 6 (%9.4) |
| Death | 2 (%0.6) | 3 (%4.7) |
| **Intensive Care Requirement** | | | **0.001**& |
| Yes | 35 (%10.5) | 28 (%43.8) |
| No | 298 (%89.5) | 36 (%56.3) |
| **Respiratory Support Requirement** | | | **0.001** ƞ |
| Invasive mechanical ventilation (Intubation) | 19 (%5.7) | 11 (%17.2) |
| Non-invasive ventilation | 6 (%1.8) | 3 (%4.7) |
| Supplemental oxygen | 34 (%10.2) | 14 (%21.9) |
| None | 274 (%82.3) | 36 (%56.3) |
| **Mortality** | | | **0.007** ƞ |
| Yes | 2 (%0.6) | 3 (%4.7) |
| No | 331 (%99.4) | 61 (%95.3) |

**n:** number of patients; **%:** column percentage. Continuous variables are presented as mean ± standard deviation and median (minimum–maximum).

**&:** Chi-square test; **ƞ:** Fisher’s exact test. Continuous variables are expressed as mean ± standard deviation and median (min–max). **‡:** Independent samples t-test; **†:** Mann–Whitney U test.

***CT:** Computed tomography; ****MRI:** Magnetic resonance imaging; *****EEG:** Electroencephalography; ******IVIG:** Intravenous immunoglobulin

**Table 4:** Comparative analysis of clinical and laboratory parameters in patients with and without encephalopathy

|  | **Encephalopathy (n)** | | |  |
| --- | --- | --- | --- | --- |
|  | **Mild** | **Severe** | **None** | **p** |
| **Age** | 71.45±47.31  72(2-175) | 80.62±57.2  72(3-180) | 40.28±43.75  24(1-200) | **0.001**€ |
| **Age ≥5 years** | | |  | **0.001**& |
| Yes | 29 (%56.9) | 8 (%61.5) | 79 (%23.7) |
| No | 22 (%43.1) | 5 (%38.5) | 254 (%76.3) |
| **Platelet count** | 270901±11649 256000(40000-567000) | 186181±112663 159000(30000-406000) | 261388±103345 240500(11000-708000) | **0.044**€ |
| **CSF* glucose** | 61.6±15.51  65(17.5-86) | 84±21.5  77(65-133) | 70.91±20.31  65.1(41-156) | **0.011**€ |
| **Organ Involvement** | | |  | **0.001** ƞ |
| Yes | 13 (25.5) | 4 (%30.8) | 30 (%9) |
| No | 38 (%74.5) | 9 (%69.2) | 303 (%91) |
| **MRI**** | | |  | **0.001** ƞ |
| Yes | 39 (%76.5) | 12 (%92.3) | 154 (%46.4) |
| No | 12 (%23.5) | 1 (%7.7) | 178 (%53.6) |
| **Necrotizing Encephalopathy** | | |  | **0.001** ƞ |
| Yes | 0 (%0) | 2 (%15.4) | 1 (%0.3) |
| No | 51 (%100) | 11 (%84.6) | 332 (%99.7) |
| **Mesencephalic Involvement** | | |  | **0.033** ƞ |
| Yes | 1 (%2) | 0 (%0) | 0 (%0) |
| No | 50 (%98) | 13 (%100) | 333 (%100) |
| **Treatement**  IVIG***  Plasmapheresis  Corticosteroids  None  IVIG+Corticosteroids  IVIG+Plasmapheresis  IVIG+Plasmapheresis+Corticosteroids | 2 (%3.9)  1 (%2)  3 (%5.9)  41 (%80.4)  3 (%5.9)  1 (%2)  0 (%0) | 3 (%23.1)  0 (%0)  0 (%0)  7 (%53.8)  1 (%7.7)  2 (%15.4)  0 (%0) | 6 (%1.8)  0 (%0)  8 (%2.4)  312 (%93.7)  5 (%1.5)  1 (%0.3)  1 (%0.3) | **0.001** ƞ |
| **Length of Hospital Stay** | 10.39±11.5  7 (1-70) | 23±31  14 (2-124) | 5.25±10  2 (0-139) | **0.001**€ |
| **Clinical Recovery** |  |  |  | **0.001**& |
| Yes | 44 (%86.3) | 7 (%53.8) | 307 (%92.2) |
| No | 7 (%13.7) | 6 (%46.2) | 26 (%7.8) |
| **Neurological Outcome** | | |  | **0.001** ƞ |
| Complete recovery | 44 (%86.3) | 7 (%53.8) | 307 (%92.2) |
| Reversible neurological deficit within 6 months | 3 (%5.9) | 1 (%7.7) | 10 (%3) |
| Long-term neurological sequelae | 2 (%3.9) | 4 (%30.8) | 14 (%4.2) |
| Death | 2 (%3.9) | 1 (%7.7) | 2 (%0.6) |
| **Intensive Care Requirement** | | |  | **0.001** ƞ |
| Yes | 17 (%33.3) | 11 (%84.6) | 35 (%10.5) |
| No | 34 (%66.7) | 2 (%15.4) | 298 (%89.5) |
| **Respiratory Support Requirement** | | |  | **0.001** ƞ |
| Invasive mechanical ventilation (Intubation) | 5 (%9.8) | 6 (%46.2) | 19 (%5.7) |
| Non-invasive ventilation | 2 (%3.9) | 1 (%7.7) | 6 (%1.8) |
| Supplemental oxygen | 11 (%21.6) | 3 (%23.1) | 34 (%10.2) |
| None | 33 (%64.7) | 3 (%23.1) | 274 (%82.3) |
| **Mortality** | | |  | **0.015** ƞ |
| Yes | 2 (%3.9) | 1 (%7.7) | 2 (%0.6) |
| No | 49 (%96.1) | 12 (%92.3) | 331 (%99.4) |

**n:** number of patients; **%:** column percentage. Continuous variables are presented as mean ± standard deviation and median (minimum–maximum).

**&:** Chi-square test; **ƞ:** Fisher’s exact test. **£:** One-way ANOVA; **€:** Kruskal–Wallis test.

***CSF:** Cerebrospinal fluid; ****MRI:** Magnetic resonance imaging; *****IVIG:** intravenous immunoglobulin.

**Table 5:** Comparison of clinical and laboratory parameters based on encephalopathy severity (mild, severe, and none).

**Table 6:** **ROC curve demonstrating the predictive performance of NISS for severe outcomes**

|  | **Cutoff** | **AUC** | **Std. Error** | **95% Confidence  Interval** | | **p** | **Sensitivity** | **Specificity** |
| --- | --- | --- | --- | --- | --- | --- | --- | --- |
|  |  |  |  | **Lower** | **Upper** |  |  |  |
| **NISS** | ≥1.5 | 0.913 | 0.0288 | 0.856 | 0.969 | <0.001 | 82.05 | 91.90 |

*AUC*: Area under the curve

**Table 7:** Diagnostic Performance of the NISS Score for Predicting Neurological Deficit

|  | **Neuroinfluenza (n)** | |  |
| --- | --- | --- | --- |
|  | **Mild** | **Severe** | **p** |
| **Age** | 41.93±43.49  24(1-200) | 65.85±55.21  48(1-200) | **0.001**† |
| **Age** **≥5 years** | | | **0.002**& |
| Yes | 88 (%26.2) | 28 (%459) |
| No | 248 (%73.8) | 33 (%54.1) |
| **Underlying Comorbidities** | | |  |
| Neuromuscular deficiency | 21 (%6.3) | 10 (%16.4) | **0.004** ƞ |
| Epilepsy | 50 (%14.9) | 15 (%24.6) |
| History of Febrile Seizures | 40 (%11.9) | 0 (%0) |
| Other Underlying Conditions | 10 (%3) | 3 (%4.9) |
| None | 215 (%64) | 33 (%54.1) |
| **Respiratory Symptoms** | | |  |
| Upper respiratory tract | 208 (%61.9) | 28 (%45.9) | **0.001**& |
| Lower respiratory tract | 39 (%11.6) | 19 (%31.1) |
| None | 89 (%26.5) | 14 (%23) |
| **Organ Involvement** | | |  |
| Yes | 29 (%11.4) | 18 (%29.4) | **0.001** ƞ |
| No | 307 (%91.4) | 43 (%70.5) |
| **White blood cell count** | 9425±4553  8700(1630-30240) | 13207±17839  11795(1308-142000) | **0.029**† |
| **Neutrofil count** | 6389±6936  5490(240-112000) | 7866.5±4478.2  7770(840-19550) | **0.003**† |
| **Alanine aminotransferase** | 42.14±149.54  18(1-2223) | 76.22±130.74  36(4-807) | **0.001**† |
| **Aspartate aminotransferase** | 77.5±288.46  41(10-4792) | 157.35±265.48  63(17-1350) | **0.034**† |
| **Ferritin** | 274.31±1443.88  46(6.5-10759) | 1012.93±2322.36  137(11-9797) | **0.022**† |
| **CSF* Protein** | 58.87±68.68  29(1-385) | 191.45±454.97  66(0.2-2310) | **0.040**† |
| **CSF* Glucose** | 64.51±13.38  65 (17.5-103) | 79.77±26.57  74 (49-156) | **0.005**† |
| **CSF* Influenza PCR**** | | |  |
| Influenza A | 6(%1.8) | 5(%8.2) | **0.001** ƞ |
| Influenza B | 0 | 0 |
| None | 1(%0.3) | 3(%4.9) |
| **MRI Findings** | | |  |
| **Necrotizing Encephalopathy** | | |  |
| Yes | 0 (%0) | 3 (%4.9) | **0.001** ƞ |
| No | 336 (%100) | 58 (%95.1) |
| **Mesencephalic Involvement** | | |  |
| Yes | 0 (%0) | 1 (%1.6) | **0.019** ƞ |
| No | 336 (%100) | 60 (%98.4) |
| **Basal Ganglia Involvement** | | |  |
| Yes | 0 (%0) | 3 (%4.9) | **0.001** ƞ |
| No | 336 (%100) | 59 (%96.7) |
| **Hippocampal Involvement** | | |  |
| Yes | 3 (%0.9) | 3 (%4.9) | **0.018** ƞ |
| No | 333 (%99.1) | 58 (%95.1) |
| **Diffusion Restriction** | | |  |
| Yes | 14 (%4.2) | 14 (%23) | **0.001**& |
| No | 322 (%95.8) | 47 (%77) |
| **Thalamic Involvement** | | |  |
| Yes | 4 (%1.2) | 5 (%8.2) | **0.001** ƞ |
| No | 332 (%98.8) | 56 (%91.8) |
| **Pons** | | |  |
| Yes | 0 (%0) | 2 (%3.3) | **0.001** ƞ |
| No | 336 (%100) | 59 (%96.7) |
| **EEG*** Findings** | | |  |
| Epileptiform Activity | 28 (%8.3) | 22 (%36.1) | **0.001**& |
| Dysrhythmia | 12 (%3.6) | 6 (%9.8) |
| Encephalopathic Pattern | 3 (%0.9) | 4 (%6.6) |
| Normal | 79 (%23.5) | 12 (%19.7) |
| Not Performed | 214 (%63.7) | 17 (%27.9) |
| **Time from Symptom Onset to Oseltamivir Initiation** | 1.69±1.26 1(1-14) | 2.11±1.38 2(1-7) | **0.006**† |
| **Duration of Oseltamivir Treatment** | 5.24±1.43 5(0-21) | 7.16±3.36 5(2-21) | **0.001**† |
| **Time to Clinical Recovery** | 2.02±1.75 1(1-15) | 9.69±17.83 4(1-116) | **0.001**† |
| **Duration of Neurological Symptoms** | 1.69±2.85 1(0.3-35) | 13.45±25.1 5(0.3-139) | **0.001**† |
| **Length of Hospital Stay** | 3.82±4.02 2(0-30) | 21.88±25.27 14(2-139) | **0.001**† |
| **Length of ICU**** Stay** | 4.18±4 3(1-15) | 11.98±18.52 7(1-116) | **0.037**† |
| **Clinical Recovery** | | | **0.001**& |
| Yes | 329 (%97.9) | 29 (%47.5) |
| No | 7 (%2.1) | 32 (%52.5) |
| **Neurological Outcome** | | | **0.001** ƞ |
| Complete recovery | 329 (%97.9) | 29 (%47.5) |
| Reversible neurological deficit within 6 months | 5 (%1.5) | 9 (%14.8) |
| Long-term neurological sequelae | 2 (%0.6) | 18 (%29.5) |
| Death | 0 (%0) | 5 (%8.2) |
| **Intensive Care Requirement** | | | **0.001**& |
| Yes | 10 (%3) | 53 (%86.9) |
| No | 326 (%97) | 8 (%13.1) |
| **Continuation of Antiepileptic Therapy at Discharge** | | |  |
| Yes | 94 (%28) | 41 (%67.2) | **0.001**& |
| No | 242 (%72) | 20 (%32.8) |
| **Initiation of New Antiepileptic Therapy** | | |  |
| Yes | 53 (%15.8) | 16 (%26.2) | **0.047**& |
| No | 283 (%84.2) | 45 (%73.8) |
| **Mortality** | | | **0.001** ƞ |
| Yes | 0 (%0) | 5 (%8.2) |
| No | 336 (%100) | 56 (%91.8) |

**n:** number of patients; **%:** column percentage. Continuous variables are presented as mean ± standard deviation and median (minimum–maximum).

**&:** Chi-square test; **ƞ:** Fisher’s exact test. **‡:** independent samples t-test; **†:** Mann–Whitney U test.

***CSF:** Cerebrospinal fluid; **PCR**: Polymerase chain reaction; ****EEG:** Electroencephalography; *****ICU:** Intensive care unit

**Table 7:** Comparison of clinical and laboratory parameters based on neuroinfluenza severity (mild and severe neuroinfluenza)
